# Supplementary material for: Elucidation of Analytical–Compositional Fingerprinting of Three Different Species of Chili Pepper by Using Headspace Solid-Phase Microextraction Coupled with Gas Chromatography–Mass Spectrometry Analysis, and Sensory Profile Evaluation
Source: MDPI journal article supplement (doi:10.3390/molecules27072355), 2022-04-06
Supplement: s1 [file s1]

# Elucidation of analytical–compositional fingerprinting of three different species of chili pepper by using Headspace Solid-Phase Microextraction coupled with Gas chromatography–Mass spectrometry analysis, and sensory profile evaluation

Emanuela Trovato <sup>1,\*</sup>, Federica Vento <sup>2</sup>, Donato Creti <sup>3</sup>, Paola Dugo <sup>1,2</sup> and Luigi Mondello <sup>1,2,4</sup> **Table S1.** Less abundant volatile compounds contained in the chili peppers samples analyzed, expressed in area% as GC-FID measurement results.

|    | Compound                      | LRL <sub>Lex</sub> | LRL <sub>Lib</sub> | Capsicum Chinense |    |      |      |    |     |      |      |      | Capsicum Annum |      |      |      |      | Capsicum Baccatum |      |      |
|----|-------------------------------|--------------------|--------------------|-------------------|----|------|------|----|-----|------|------|------|----------------|------|------|------|------|-------------------|------|------|
|    |                               |                    |                    | 1                 | 2  | 3    | 4    | 5  | 6   | 7    | 8    | 9    | 10             | 11   | 12   | 13   | 14   | 15                | 16   | 17   |
| 15 | Tiglic aldehyde               | 742                | 738                | tr                | tr | tr   | tr   | tr | tr  | 0.2  |      |      |                |      |      |      | tr   |                   | 0.06 |      |
| 26 | Butanoic acid                 | 791                | 818                |                   | tr |      | tr   | tr |     | 0.17 |      |      | tr             |      |      |      |      |                   |      |      |
| 32 | 5-Methyl-3-hexanone           | 832                | 842                |                   | tr | tr   | tr   | tr | tr  | tr   |      | 0.09 |                |      |      |      |      | tr                | tr   | tr   |
| 34 | (Z)-2-Hexenal                 | 842                | 842                | tr                |    |      |      |    |     |      |      |      |                | 0.25 | 0.14 | 0.17 | 0.39 | 0.42              | 0.34 | 0.16 |
| 36 | Ethyl iso-valerate            | 850                | 850                |                   | tr | 0.17 | 0.16 | tr | 0.1 |      |      | 0.24 |                |      |      |      |      |                   |      | 0.08 |
| 45 | 5-Methyl-3-hexen-2-one        | 897                | 894                | tr                |    | tr   |      | tr | tr  |      | 0.09 |      | 0.15           | tr   | 0.13 | 0.08 | tr   | tr                | tr   | tr   |
| 46 | n-Heptanal                    | 902                | 906                | tr                | tr | tr   | tr   | tr | tr  |      | tr   | 0.14 | 0.07           | tr   | 0.07 | 0.06 | tr   | tr                | tr   | 0.15 |
| 47 | 3-(Methylthio)propionaldehyde | 907                | 909                | tr                | tr | tr   | tr   | tr | tr  | 0.06 | 0.1  | 0.14 | tr             | tr   | 0.09 | 0.11 | tr   | tr                | 0.05 | tr   |
| 48 | Sorbaldehyde                  | 914                | 923                | tr                |    | tr   | tr   |    | tr  | tr   | 0.33 | 0.44 | tr             | 0.08 |      | 0.3  | tr   | 0.36              | 0.24 | 0.22 |
| 49 | Sorbic aldehyde               | 916                | 914                |                   |    |      |      |    |     |      | 0.19 | 0.48 | tr             | 0.11 |      | 0.11 | 0.46 | 0.15              | 0.47 |      |
| 50 | γ-Butyrolactone               | 918                | 910                | tr                | tr | tr   |      | tr |     | tr   |      | 0.18 | 0.08           | 0.24 |      | 0.12 | 0.13 |                   |      | 0.35 |
| 51 | 3-Methyl-apopinene            | 921                | 927                |                   |    |      | tr   |    | tr  |      |      | 0.07 | tr             | 0.19 | 0.07 |      | 0.38 | 0.15              |      | 0.19 |
| 52 | Ethyl tiglate                 | 823                | 933                |                   | tr |      |      |    | tr  |      | tr   |      | 0.06           | tr   | tr   | tr   |      | tr                |      | 0.09 |
| 53 | α-Thujene                     | 925                | 927                |                   | tr |      | tr   | tr | tr  |      |      |      | 0.07           | 0.08 | 0.09 | tr   | tr   | tr                |      |      |
| 54 | α-Pinene                      | 931                | 933                |                   |    |      | tr   |    |     |      |      | 0.13 | tr             | tr   | tr   | tr   |      | tr                |      | tr   |
| 55 | Hexyl formate                 | 936                | 929                |                   |    |      | tr   |    |     | tr   | tr   | 0.06 | tr             | tr   | 0.06 | 0.05 | tr   | tr                |      | tr   |
| 56 | 4-Methyl-1-hexanol            | 946                | 953                | tr                | tr | tr   | tr   | tr | tr  | tr   | tr   | 0.15 | 0.05           | 0.05 | 0.12 | 0.05 | tr   | tr                | 0.07 | tr   |
| 57 | 3-Methyl-cyclohexanone        | 950                | 951                |                   |    |      | tr   |    | tr  | 0.11 | tr   | 0.08 | 0.05           | tr   | tr   | tr   |      | tr                |      | tr   |
| 58 | (E)-2-Heptenal                | 959                | 956                |                   | tr | tr   | tr   | tr |     |      |      | 0.14 |                | tr   | tr   | 0.06 | tr   | 0.06              | 0.07 | 0.27 |

|    |                               |      |      |     |      |     |    |      |      |      |      |      |      |      |      |      |      |      |      |      |
|----|-------------------------------|------|------|-----|------|-----|----|------|------|------|------|------|------|------|------|------|------|------|------|------|
| 59 | Isobutyl butanoate            | 961  | 953  |     | tr   | tr  | tr | tr   | 0.46 | 0.06 |      |      | tr   | tr   | 0.08 | 0.05 | tr   | 0.09 |      | 0.42 |
| 61 | Ethyl isohexanoate            | 963  | 969  | 0.1 | tr   | 0.2 | tr | tr   | 0.17 | 0.26 | 0.05 | 0.27 | 0.05 | tr   | 0.12 | 0.08 | tr   | 0.08 | 0.05 | 0.06 |
| 62 | Benzaldehyde                  | 966  | 960  | tr  | tr   |     | tr | tr   | tr   |      | tr   | 0.14 | 0.06 | 0.09 | 0.18 | tr   | 0.09 | 0.06 | tr   | tr   |
| 63 | Isohexanoic acid              | 968  | 986  | tr  | 0.07 |     | tr | tr   |      | 0.29 | 0.08 |      | 0.08 | tr   | 0.08 | tr   | tr   | 0.06 | 0.06 |      |
| 64 | <i>n</i> -Heptanol            | 970  | 970  | tr  | 0.15 | tr  | tr | 0.16 |      | tr   |      | 0.09 | tr   | tr   |      | tr   |      | tr   | tr   | 0.07 |
| 65 | Sabinene                      | 972  | 972  | tr  |      | tr  |    |      |      | 0.06 | 0.18 |      |      | tr   | 0.1  |      | tr   | tr   | 0.1  | tr   |
| 66 | β-Pinene                      | 975  | 978  |     |      | tr  |    |      |      | tr   | 0.37 |      | tr   | tr   | 0.08 |      |      | tr   |      | tr   |
| 67 | 2-Ethylbutyl acetate          | 976  | 972  | tr  |      | tr  | tr |      | tr   | 0.09 |      |      |      |      | 0.44 | 0.16 | tr   | tr   |      | 0.14 |
| 68 | 3-Methylmercapto-1-propanol   | 985  | 982  | tr  |      |     | tr |      | 0.05 |      |      |      |      | 0.06 | 0.39 | 0.36 |      |      |      |      |
| 72 | Isobutyl 2-methylbutanoate    | 1001 | 1002 | tr  | tr   | tr  | tr | tr   | 0.05 | tr   | tr   | 0.18 | 0.07 |      | 0.11 | tr   |      | tr   | 0.07 | tr   |
| 73 | <i>n</i> -Octanal             | 1002 | 1006 | tr  |      | tr  | tr | tr   | tr   | tr   | tr   | 0.21 | tr   | tr   | 0.38 | 0.06 | tr   | tr   | 0.05 | tr   |
| 74 | <i>p</i> -Mentha-1(7),8-diene | 1003 | 1004 | tr  | tr   | tr  | tr | tr   |      | tr   | tr   |      |      | tr   |      |      | tr   | 0.05 | 0.07 | 0.33 |

|     | Compound                           | LRL <sub>ex</sub> | LRL <sub>lib</sub> | <i>Capsicum Chinense</i> |      |      |      |      |      |      |      |      | <i>Capsicum Annum</i> |      |      |      |      | <i>Capsicum Baccatum</i> |      |      |
|-----|------------------------------------|-------------------|--------------------|--------------------------|------|------|------|------|------|------|------|------|-----------------------|------|------|------|------|--------------------------|------|------|
|     |                                    |                   |                    | 1                        | 2    | 3    | 4    | 5    | 6    | 7    | 8    | 9    | 10                    | 11   | 12   | 13   | 14   | 15                       | 16   | 17   |
| 75  | Isobutyl isovalerate               | 1005              | 1005               | 0.06                     | tr   | 0.07 | tr   | tr   | 0.18 | 0.14 | tr   |      |                       | 0.06 |      | 0.15 |      | 0.13                     | tr   | 0.22 |
| 76  | Ethyl (Z)-hex-3-enoate             | 1006              | 1003               |                          | tr   | tr   | tr   | 0    | tr   |      | tr   | 0.14 |                       | tr   |      | 0.06 | 0.08 |                          | tr   | 0.43 |
| 77  | Isopentyl- isobutanoate            | 1011              | 1014               |                          | tr   | 0.1  | tr                    | 0.05 | tr   | tr   |      |                          | tr   |      |
| 78  | Pentyl 2-methylpropanoate          | 1014              | 1016               | tr                       | tr   | tr   | tr   | 0.23 | tr   | 0.12 | tr   | 0.17 |                       | tr   |      | tr   | 0.08 | tr                       | 0.09 | 0.15 |
| 79  | (E)-6-Methylhept-4-en-1-ol         | 1020              | 1019               | 0.08                     | tr   | 0.23 | 0.13 |      | tr   | 0.29 |      | 0.06 | tr                    | tr   | 0.15 | 0.06 | 0.05 | tr                       | 0.09 | tr   |
| 82  | 2-Ethyl-1-hexanol                  | 1029              | 1031               | tr                       | 0.05 |      | tr   | tr   | tr   | tr   | 0.07 |      | 0.1                   | 0.21 | 0.44 | 0.43 | tr   | 0.09                     | 0.1  | 0.26 |
| 83  | 3-Methyl-1-heptanol                | 1034              | 1041               | tr                       | tr   | tr   | tr   | tr   |      |      | 0.16 | 0.24 |                       |      |      |      | tr   | tr                       | tr   | tr   |
| 85  | Benzyl alcohol                     | 1036              | 1040               | tr                       |      | tr   | tr   | tr   | tr   | tr   | 0.1  | 0.14 | tr                    | 0.1  | 0.11 | 0.15 | tr   | tr                       | 0.1  | tr   |
| 86  | 9-Methyl-1-decene                  | 1038              | 1041               | tr                       | tr   | tr   | tr   |      | tr   | tr   | tr   | 0.32 | 0.06                  | 0.05 |      | 0.22 | tr   | 0.14                     | 0.13 | tr   |
| 87  | Phenylacetaldehyde                 | 1043              | 1045               | 0.12                     | tr   | tr   | tr   | tr   | tr   | 0.05 | 0.07 | 0.14 | 0.07                  | 0.16 | 0.17 | 0.19 | 0.28 | tr                       | 0.06 | 0.19 |
| 88  | 5-Methyldecane                     | 1044              | 1054               |                          |      |      |      | tr   | tr   |      | tr   |      |                       |      | 0.17 | tr   | 0.09 |                          | 0.27 |      |
| 89  | Amyl pivalate                      | 1045              | 1047               | tr                       |      | tr   | 0.1  | 0.07 | 0.06 |      | tr   |      | 0.06                  | 0.34 |      |      |      | 0.06                     |      |      |
| 92  | 2-Methyloctanal                    | 1052              | 1059               | tr                       | tr   | tr   |      |      | tr   | 0.11 | tr   | 0.14 | 0.22                  | tr   | 0.06 | tr   | tr   | 0.28                     | tr   | 0.05 |
| 93  | γ-Terpinene                        | 1055              | 1058               | tr                       |      |      | tr   | tr   | tr   | tr   | 0.19 | 0.18 | 0.18                  | 0.06 | 0.17 | 0.06 | tr   | 0.19                     |      | 0.4  |
| 95  | n-Octanol                          | 1071              | 1076               | tr                       | tr   | tr   | tr   | 0.11 | tr   | 0.12 |      | 0.08 | tr                    | 0.05 | 0.23 | 0.16 | tr   | tr                       | 0.06 | tr   |
| 96  | (E)-3-Octen-1-ol                   | 1074              | 1081               | tr                       | tr   | tr   | tr   |      |      | tr   | tr   | 0.13 | 0.06                  | tr   | 0.22 | 0.05 | tr   | 0.05                     | 0.06 | 0.13 |
| 97  | n-Heptanoic acid                   | 1080              | 1116               | tr                       | tr   | tr   | 0.07 |      | tr   | tr   |      | 0.1  | tr                    | 0.05 | 0.12 | 0.05 | 0.1  | 0.16                     | 0.12 | 0.06 |
| 102 | 2-Methylbutyl 2-methylbutanoate    | 1101              | 1104               | tr                       | tr   | tr   | tr   | tr   | 0.07 | tr   | tr   |      |                       | tr   |      | tr   | tr   | 0.26                     | tr   | 0.11 |
| 108 | Phenethyl alcohol                  | 1113              | 1113               | 0.06                     |      | tr   | tr   | tr   | tr   | tr   | tr   | 0.16 | tr                    | tr   | tr   | tr   | tr   | tr                       | 0.3  | tr   |
| 109 | p-Menta-1,3,8-triene               | 1122              | 1112               | tr                       |      | tr   |      |      |      | tr   | tr   | tr   |                       | tr   | tr   | tr   | tr   | tr                       |      | 0.42 |
| 110 | 2-Ethylhexoic acid                 | 1127              | 1137               | tr                       |      | 0.19 |      |      | 0.13 | tr   | tr   | 0.07 |                       | tr   | tr   | tr   | tr   | 0.12                     |      | 0.28 |
| 113 | Pentyl 2-methylbutanoate           | 1136              | 1142               | tr                       | tr   | tr   | 0.19 | tr   | 0.29 | tr   | 0.19 | 0.15 | 0.08                  | tr   | 0.36 | 0.11 | 0.07 |                          | 0.21 | tr   |
| 115 | (Z)-3-Hexenyl isobutanoate         | 1141              | 1146               | tr                       | 0.06 | tr   | 0.1  |      | 0.1  | 0.11 | tr   | 0.1  |                       |      |      | 0.09 |      | tr                       |      |      |
| 118 | 3-Methylbut-2-enyl methylbutanoate | 3-1148            | 1150               | tr                       |      | 0.1  | tr   | 0.06 | 0.16 |      | tr   | 0.06 |                       |      | tr   | tr   |      |                          |      |      |
| 119 | Dictyopteren D'                    | 1150              |                    | 0.21                     | 0.16 | 0.1  | 0.22 |      | 0.16 |      | tr   | 0.08 |                       |      | 0.09 | tr   | 0.29 |                          |      |      |
| 120 | neo-Isopulegol                     | 1152              | 1148               | tr                       | 0.1  | 0.05 | tr   | tr   | tr   | 0.07 | tr   | 0.18 | 0.21                  | 0.05 | 0.09 | 0.05 | tr   | 0.05                     | 0.06 | 0.08 |
| 121 | (E)-Pinocampnone                   | 1160              | 1160               | tr                       | tr   | tr   | tr   |      |      | tr   | tr   | 0.15 | tr                    | 0.06 | 0.1  | 0.11 | tr   | tr                       |      | 0.36 |
| 122 | Tetrahydrolavandulol               | 1168              | 1162               |                          |      | tr   |      | tr   | tr   | 0.22 |      | 0.28 | tr                    | tr   | 0.11 | 0.13 | 0.05 | tr                       | 0.05 |      |
| 123 | Ethyl benzoate                     | 1170              | 1170               | tr                       | tr   | tr   | tr   | tr   |      | tr   | tr   | 0.23 |                       | tr   | 0.13 | tr   |      | tr                       |      | 0.22 |
| 124 | Benzenecarboxylic acid             | 1175              | 1213               | tr                       | tr   | tr   | tr   |      |      | tr   |      | 0.1  | 0.1                   | tr   |      |      |      |                          |      | tr   |

|     |                                   |                    |                    |                   |      |      |      |      |      |      |      |      |                |      |      |      |      |                   |      |      |
|-----|-----------------------------------|--------------------|--------------------|-------------------|------|------|------|------|------|------|------|------|----------------|------|------|------|------|-------------------|------|------|
| 126 | Neoisomenthol                     | 1182               | 1189               | tr                |      |      | tr   |      |      | 0.1  |      |      | tr             |      |      |      |      | 0.1               |      |      |
| 127 | Terpinen-4-ol                     | 1183               | 1184               |                   |      |      | tr   |      |      | tr   |      |      | 0.32           |      |      |      |      |                   |      |      |
| 128 | Nonanol                           | 1185               | 1176               | tr                | tr   | 0.12 | 0.28 | tr   | 0.24 | tr   | tr   | 0.12 | tr             |      |      |      |      | 0.06              |      |      |
|     | Compound                          | LRL <sub>Lex</sub> | LRL <sub>lib</sub> | Capsicum Chinense |      |      |      |      |      |      |      |      | Capsicum Annum |      |      |      |      | Capsicum Baccatum |      |      |
|     |                                   |                    |                    | 1                 | 2    | 3    | 4    | 5    | 6    | 7    | 8    | 9    | 10             | 11   | 12   | 13   | 14   | 15                | 16   | 17   |
| 129 | n-Octanoic acid                   | 1188               | 1192               | 0.07              | tr   | tr   | tr   | tr   | tr   | tr   |      | 0.06 | tr             | tr   | 0.12 | 0.09 |      |                   | tr   | 0.06 |
| 130 | Ethyl (4Z)-4-octenoate            | 1191               | 1184               | tr                |      |      | tr   | tr   | tr   | 0.06 | tr   |      |                |      | 0.06 | tr   | tr   | tr                |      | tr   |
| 131 | Hexyl butanoate                   | 1192               | 1195               | tr                | tr   | tr   |      |      | 0.07 | tr   | tr   | 0.07 | tr             |      | 0.1  | 0.06 | tr   | tr                | tr   | tr   |
| 132 | Methyl salicylate                 | 1193               | 1192               | tr                | tr   | tr   | 0.05 | tr   |      | tr   | 0.11 | 0.33 | tr             | 0.29 | 0.12 | tr   | tr   | 0.05              | 0.07 | tr   |
| 133 | n-Dodecane                        | 1196               | 1187               |                   | tr   | tr   |      |      |      |      |      |      | tr             | tr   | 0.12 | 0.07 | tr   | tr                | 0.05 | 0.15 |
| 136 | Pelargol                          | 1208               | 1200               | tr                |      |      | tr   | tr   | tr   | tr   | tr   | 0.23 | tr             | 0.06 | 0.07 | 0.13 |      | tr                | tr   | tr   |
| 137 | 4-Methylhexyl isobutanoate        | 1215               | 1220               | 0.09              | 0.05 | tr   | 0.32 | tr   | tr   | tr   | tr   | 0.08 |                | tr   | 0.08 | 0.06 | tr   | tr                | 0.06 |      |
| 139 | ESTER                             | 1226               |                    | 0.4               | 0.29 | 0.34 | 0.1  | 0.14 | 0.18 | 0.17 | 0.4  | 0.11 | 0.06           | tr   | 0.09 | 0.05 | 0.06 | tr                | tr   | tr   |
| 146 | ESTER                             | 1257               |                    | 0.06              | 0.05 | tr   | tr   | tr   | tr   | tr   | tr   |      |                | tr   | 0.14 | 0.07 | tr   | tr                | tr   | tr   |
| 147 | 2-Methyldodecane                  | 1263               | 1265               | tr                | tr   | tr   | 0.07 | tr   | 0.1  | tr   | tr   | 0.1  | tr             | tr   | 0.17 | tr   | 0.06 | tr                | 0.05 | tr   |
| 148 | Ethyl salicylate                  | 1273               | 1270               | 0.18              | tr   | 0.13 | tr   | tr   | 0.12 | 0.09 | 0.05 | 0.18 | tr             | tr   | 0.08 | 0.05 | tr   | tr                | 0.07 | 0.37 |
| 149 | n-Nonanoic acid                   | 1275               | 1289               | 0.09              | tr   | 0.08 | 0.13 | 0.11 | 0.08 | tr   | 0.09 | 0.14 | 0.06           | tr   | 0.19 | 0.06 |      | tr                | tr   | tr   |
| 150 | Hexyl angelate                    | 1285               | 1283               | 0.19              | tr   | tr   | 0.26 |      | tr   | tr   | tr   | 0.07 | tr             | tr   | 0.18 | tr   | tr   | tr                | tr   | tr   |
| 153 | 5-Methylhexyl 2-methylbutanoate   | 1294               | 1299               | tr                | 0.08 | tr   | 0.23 | tr   | tr   | tr   |      |      |                | tr   |      | 0.1  | tr   |                   |      |      |
| 154 | n-Tridecane                       | 1298               | 1300               | 0.06              | tr   | tr   | 0.08 |      | tr   | tr   | tr   | 0.2  | tr             | 0.14 | 0.19 |      | 0.1  | tr                | 0.06 | 0.09 |
| 156 | Hexyl pentanoate                  | 1301               | 1293               |                   | 0.12 |      | 0.11 | 0.29 |      |      |      |      |                |      | 0.1  | tr   |      |                   |      |      |
| 161 | Dihydro citronellol acetate       | 1316               | 1319               |                   | tr   | tr   | tr   | 0.07 |      | tr   |      | 0.1  | tr             | tr   | tr   | tr   | tr   | tr                | tr   | 0.09 |
| 162 | (E)-3-Hexenyl tiglate             | 1317               | 1319               | 0.09              | 0.19 | 0.08 | 0.1  | tr   | tr   | tr   | tr   | 0.19 |                | tr   |      | tr   | tr   | tr                | 0.06 | tr   |
| 163 | (Z)-3-Hexenyl tiglate             | 1321               | 1325               | 0.11              | 0.07 | 0.06 | tr   | 0.07 | 0.11 | tr   | 0.25 | 0.1  | tr             | tr   | 0.09 | tr   | tr   |                   |      | tr   |
| 164 | Hexyl tiglate                     | 1328               | 1329               | 0.06              | 0.16 | 0.07 | 0.07 | 0.26 | 0.1  | tr   | tr   | 0.08 |                |      |      | tr   | tr   |                   |      | tr   |
| 166 | 1-Nonadecyne                      | 1334               |                    | 0.05              |      |      | 0.16 |      | 0.07 | tr   |      | 0.18 |                |      |      | tr   |      |                   | tr   |      |
| 168 | Octyl isobutanoate                | 1342               | 1346               | tr                | tr   | 0.08 | 0.18 | 0.11 | tr   |      |      | 0.06 |                |      |      | tr   |      | tr                | tr   |      |
| 169 | (Z)-Hept-3-enyl 2-methylbutanoate | 1345               |                    | 0.09              | 0.28 | 0.09 | 0.05 | 0.08 | 0.1  | 0.06 |      | 0.07 |                |      | 0.11 | tr   |      |                   |      |      |
| 173 | Ethyl 8-methylnonanoate           | 1358               | 1359               | 0.15              | 0.2  | 0.18 | 0.28 | 0.05 | tr   | 0.06 | tr   | 0.07 |                | tr   | 0.06 | tr   | 0.1  |                   | tr   | tr   |
| 175 | n-Decanoic acid                   | 1374               | 1398               | tr                | tr   | 0.33 | tr   | tr   | tr   | tr   | tr   |      |                | tr   | 0.09 |      | tr   |                   | tr   | tr   |
| 184 | Benzyl isovalerate                | 1395               | 1399               |                   | 0.14 |      | 0.15 | tr   | 0.06 | tr   | tr   |      |                |      |      |      |      |                   |      |      |
| 185 | n-Tetradecane                     | 1397               | 1400               | tr                |      | tr   |      |      | 0.09 | tr   | 0.06 | 0.24 | 0.05           | 0.05 | 0.23 | 0.1  | tr   | tr                | 0.08 | 0.06 |
| 187 | n-Dodecanal                       | 1409               | 1412               | tr                | 0.06 | tr   | tr   | tr   | tr   | tr   | tr   | 0.06 | tr             | tr   | 0.13 | 0.05 | tr   | tr                | 0.07 | tr   |

|     |                                         |                          |                          |                          |          |          |          |          |          |          |          |          |                       |           |           |           |                          |           |           |           |
|-----|-----------------------------------------|--------------------------|--------------------------|--------------------------|----------|----------|----------|----------|----------|----------|----------|----------|-----------------------|-----------|-----------|-----------|--------------------------|-----------|-----------|-----------|
| 188 | (Z)- $\alpha$ -Bergamotene              | 1411                     | 1416                     | tr                       | tr       | tr       | tr       | tr       | tr       | tr       | 0.09     |          | tr                    | 0.13      | 0.13      | tr        | tr                       | tr        | tr        |           |
| 189 | Longifolene                             | 1413                     | 1412                     | tr                       | 0.1      | tr       | tr       | tr       | tr       | tr       | 0.18     |          |                       |           | tr        | tr        | tr                       | 0.09      |           |           |
| 190 | $\alpha$ -Cedrene                       | 1416                     | 1414                     | 0.12                     | tr       | tr       | 0.2      | 0.29     | tr       | tr       | 0.09     |          | tr                    |           | 0.1       | 0.07      |                          |           |           |           |
| 191 | (E)-Caryophyllene                       | 1420                     | 1424                     |                          | 0.1      | tr       | tr       | tr       | tr       | tr       | tr       |          |                       |           | tr        | 0.12      | 0.32                     |           | tr        |           |
| 193 | $\gamma$ -Elemene                       | 1427                     | 1432                     | 0.09                     | 0.26     | 0.12     | 0.12     | 0.16     | 0.08     | tr       | 0.12     |          |                       |           |           | 0.1       |                          |           |           |           |
|     | <b>Compound</b>                         | <b>LRL<sub>Lex</sub></b> | <b>LRL<sub>lib</sub></b> | <b>Capsicum Chinense</b> |          |          |          |          |          |          |          |          | <b>Capsicum Annum</b> |           |           |           | <b>Capsicum Baccatum</b> |           |           |           |
|     |                                         |                          |                          | <b>1</b>                 | <b>2</b> | <b>3</b> | <b>4</b> | <b>5</b> | <b>6</b> | <b>7</b> | <b>8</b> | <b>9</b> | <b>10</b>             | <b>11</b> | <b>12</b> | <b>13</b> | <b>14</b>                | <b>15</b> | <b>16</b> | <b>17</b> |
| 194 | $\beta$ -Copaene                        | 1431                     | 1433                     | 0.3                      | 0.29     | 0.16     | 0.08     | 0.15     | tr       | tr       |          | 0.24     | tr                    |           | tr        |           | 0.2                      |           | tr        |           |
| 195 | Octyl 2-methylbutanoate                 | 1434                     | 1433                     | 0.07                     | 0.39     | 0.19     | 0.14     | 0.25     | 0.07     |          | tr       |          |                       |           | 0.31      | 0.13      |                          |           |           |           |
| 201 | Cadina-3,5-diene                        | 1449                     | 1452                     | tr                       | tr       |          | 0.07     | 0.12     |          |          |          | 0.1      |                       | tr        | 0.13      |           |                          |           |           |           |
| 203 | (E)- $\beta$ -Farnesene                 | 1453                     | 1452                     |                          |          |          | tr       | 0.28     |          | tr       |          |          |                       | tr        | 0.36      | 0.09      | tr                       | tr        | 0.21      |           |
| 204 | $\alpha$ -Humulene                      | 1456                     | 1454                     | 0.07                     | 0.13     | 0.08     | 0.06     | 0.34     | 0.06     | tr       | tr       |          |                       | tr        | 0.1       |           | tr                       | tr        | tr        |           |
| 205 | $\alpha$ -Patchoulene                   | 1461                     | 1459                     | 0.08                     |          |          | 0.13     | 0.11     | tr       | tr       |          |          | 0.08                  |           | tr        | tr        |                          |           | tr        | tr        |
| 208 | Cadina-1(6),4-diene                     | 1474                     | 1474                     | 0.1                      | 0.1      | 0.09     | 0.13     | 0.07     | 0.12     | tr       | tr       | 0.2      |                       |           |           | tr        | tr                       |           | 0.1       | tr        |
| 209 | $\gamma$ -Muurolene                     | 1475                     | 1478                     | 0.16                     | 0.27     | 0.08     | 0.2      | 0.1      | 0.11     | tr       | tr       | 0.32     |                       | tr        | tr        |           | tr                       | tr        | 0.28      | tr        |
| 215 | 6-Methylhept-4-en-1-yl methylpentanoate | 1493                     | 1484                     | 0.14                     | 0.22     | 0.25     | 0.13     | 0.24     | tr       | tr       |          | tr       |                       | 0.07      | tr        | tr        | 0.1                      | tr        | 0.27      | 0.05      |
| 216 | $\gamma$ -Amorphene                     | 1494                     | 1490                     | 0.18                     | 0.15     | 0.08     | 0.12     | 0.08     | tr       | tr       |          | 0.09     |                       |           |           |           | tr                       |           | 0.07      |           |
| 221 | ESTER                                   | 1512                     |                          | tr                       | tr       | 0.08     | tr       | tr       | tr       |          |          |          |                       |           | 0.1       | tr        | tr                       |           |           | tr        |
| 222 | $\gamma$ -Cadinene                      | 1514                     | 1512                     | 0.16                     | 0.14     | 0.05     | 0.11     | 0.08     | tr       | tr       |          |          |                       |           | 0.08      | tr        |                          | tr        | tr        | tr        |
| 224 | (E)-Calamenene                          | 1522                     | 1527                     | 0.36                     | 0.2      | 0.22     | 0.36     | 0.16     | 0.16     | tr       | tr       | 0.13     |                       |           | 0.08      | 0.06      |                          | tr        | 0.09      | tr        |
| 225 | Citronellyl butanoate                   | 1533                     | 1529                     | 0.09                     | 0.06     | 0.1      | 0.06     | 0.05     | 0.07     | tr       |          | 0.07     |                       |           |           | tr        | tr                       |           |           | tr        |
| 226 | (E)-Cadina-1,4-diene                    | 1534                     | 1536                     | tr                       |          | 0.09     | tr       | 0.08     | tr       |          | tr       | 0.11     |                       | tr        | 0.15      | tr        | 0.16                     |           | tr        | tr        |
| 228 | ESTER                                   | 1546                     |                          | 0.13                     | 0.14     | 0.16     | 0.06     | 0.06     | tr       | tr       | tr       | 0.08     |                       |           | 0.09      | tr        | tr                       |           |           | tr        |
| 229 | Dodecanethiol                           | 1547                     | 1543                     | tr                       | tr       | 0.08     | 0.09     | tr       | tr       | tr       | tr       | 0.07     |                       | tr        | 0.16      | tr        | tr                       |           |           |           |
| 230 | Geranyl butanoate                       | 1551                     | 1559                     | 0.06                     | 0.17     | tr       | 0.07     | 0.2      |          |          |          |          |                       |           |           | tr        |                          |           |           |           |
| 231 | (E)-Nerolidol                           | 1558                     | 1561                     |                          |          | tr       |          |          |          |          |          |          |                       |           |           |           | 0.4                      |           |           |           |
| 232 | 12-Methyl-oxa-cyclododecan-2-one        | 1559                     |                          | 0.06                     |          |          | 0.12     | tr       |          |          |          |          |                       |           | 0.06      | tr        |                          |           |           |           |
| 233 | 2-Methyl pentadecane                    | 1561                     | 1567                     | 0.44                     | 0.18     | 0.14     | 0.19     | 0.06     | tr       | tr       | tr       | 0.17     |                       | 0.1       | 0.12      | tr        | tr                       | tr        | tr        | tr        |
| 234 | 3-Methyl pentadecane                    | 1568                     | 1574                     | 0.08                     | 0.05     | tr       | tr       | tr       | tr       | tr       | tr       | 0.08     |                       | tr        | 0.12      | tr        | tr                       | tr        |           | tr        |
| 236 | (Z)-2-Tridecen-1-ol                     | 1578                     | 1572                     | tr                       | tr       | 0.13     | tr       | 0.06     | tr       |          |          |          | tr                    |           |           |           |                          |           |           | tr        |
| 239 | Ethyl dodecanoate                       | 1591                     | 1598                     | 0.19                     | 0.12     |          | 0.14     | 0.08     | 0.07     |          |          |          | tr                    |           | 0.07      | tr        | tr                       |           |           | tr        |

|       |                                            |                   |                    |                   |      |      |      |      |      |      |      |       |                |      |      |      |      |                   |      |      |
|-------|--------------------------------------------|-------------------|--------------------|-------------------|------|------|------|------|------|------|------|-------|----------------|------|------|------|------|-------------------|------|------|
| 240   | <i>n</i> -Hexadecane                       | 1598              | 1600               | tr                | 0.05 | 0.06 | tr   | tr   | 0.07 | tr   | tr   | 0.15  | 0.06           | 0.11 | tr   | 0.07 | tr   | tr                |      |      |
| 241   | 8-Methylnonanoic acid, 2-methylbutyl ester | 1606              | 1610               | 0.42              | 0.35 | 0.2  | 0.16 | 0.08 | tr   | tr   |      |       |                |      | 0.07 | 0.21 |      |                   |      |      |
| 242   | $\alpha$ -Corocalene                       | 1543              | 1544               | tr                | tr   | tr   | tr   | tr   | tr   |      | tr   |       |                | 0.11 | tr   |      |      |                   |      |      |
| 243   | Isopentyl 8-methylnon-6-enoate             | 1594              | 1592               | tr                | tr   | 0.14 | tr   | tr   | tr   | tr   |      |       |                |      | tr   | tr   |      | tr                |      |      |
| 244   | Oxacyclotetradecan-2-one                   | 1629              | 1632               | 0.08              | 0.25 | 0.36 | 0.35 | tr   | tr   | tr   |      | 0.15  |                | 0.15 | 0.06 | 0.21 | tr   |                   |      |      |
| 245   | 14-Methyl-oxacyclotetradecan-2-one         | 1650              | 1660               | 0.15              | 0.05 | 0.12 | 0.27 | tr   |      | tr   | tr   |       |                | 0.12 | tr   | 0.4  |      | tr                |      |      |
|       | Compound                                   | LRL <sub>ex</sub> | LRL <sub>lib</sub> | Capsicum Chinense |      |      |      |      |      |      |      |       | Capsicum Annum |      |      |      |      | Capsicum Baccatum |      |      |
|       |                                            |                   |                    | 1                 | 2    | 3    | 4    | 5    | 6    | 7    | 8    | 9     | 10             | 11   | 12   | 13   | 14   | 15                | 16   | 17   |
| 246   | Cadin-4-en-10-ol                           | 1657              | 1659               | 0.11              | tr   |      | tr   | 0.12 | tr   | tr   |      |       |                |      | 0.17 | tr   |      | tr                |      | tr   |
| 247   | 2-Methyl hexadecane                        | 1660              | 1664               | 0.32              | 0.11 | 0.15 | 0.08 | tr   | tr   | tr   |      | 0.16  |                |      | 0.23 | tr   | 0.23 |                   |      |      |
| 248   | 8-hydroxy-isobornyl isobutanoate           | 1665              | 1676               | tr                | 0.06 | 0.08 | 0.06 | tr   | tr   | tr   | tr   | 0.12  | tr             | 0.07 | 0.18 | tr   |      | tr                | tr   | 0.05 |
| 251   | <i>n</i> -Heptadecane                      | 1696              | 1700               | 0.35              | 0.22 | 0.18 | 0.1  | tr   | 0.06 | tr   | tr   | 0.2   |                | 0.07 | 0.1  | tr   | tr   | tr                |      | tr   |
| 253   | Hexyl 8-methylnon-6-enoate                 | 1720              | 1730               | tr                | tr   | 0.28 | tr   | tr   | tr   | tr   | tr   | 0.11  |                | tr   | 0.12 | tr   | tr   | tr                |      |      |
| 254   | 2-Methyl-heptadecane                       | 1762              | 1763               | tr                | tr   | tr   | tr   | tr   | tr   |      |      | 0.05  |                |      |      |      |      | tr                |      |      |
| 255   | (Z)-2-Pentadecenal                         | 1764              | 1760               | tr                | tr   | tr   | tr   | tr   | tr   |      |      |       |                |      | 0.1  |      |      |                   |      |      |
| 256   | 3-Methyl-heptadecane                       | 1767              | 1774               | tr                | tr   | tr   | tr   | tr   | tr   | tr   |      |       |                |      | 0.09 |      | tr   |                   |      |      |
| 257   | (Z)-2-Pentadecenol                         | 1778              | 1776               | tr                | tr   | tr   | tr   | tr   | tr   | tr   | tr   | 0.12  | tr             |      | 0.1  |      |      |                   | tr   | tr   |
| 258   | 1-Tetradecyl acetate                       | 1804              | 1810               | tr                | tr   | tr   | tr   | tr   | tr   | tr   | tr   |       |                |      | 0.14 |      |      |                   |      |      |
| 259   | Pentadecylic acid                          | 1823              | 1869               |                   | tr   | tr   |      | 0.05 |      | tr   |      |       |                |      | 0.16 |      |      |                   |      |      |
| 260   | Pentadecanolide                            | 1830              | 1827               | tr                | tr   | tr   | tr   | tr   |      |      |      |       |                |      | 0.16 |      |      |                   |      | tr   |
| 263   | ESTER                                      | 1861              |                    | tr                | tr   | 0.24 | tr   | tr   | tr   |      |      |       |                |      |      |      |      |                   |      |      |
| 263   | <i>n</i> -Hexadecanol                      | 1884              | 1884               | tr                | tr   | tr   | tr   | 0.08 | tr   |      |      |       |                |      |      |      |      |                   |      |      |
| 264   | <i>n</i> -Heptadecanal                     | 1915              | 1918               | tr                | tr   | tr   | tr   | tr   | tr   | tr   |      | 0.07  | tr             |      | 0.08 |      | tr   |                   |      | tr   |
| 265   | Hexadecanolact-16-one                      | 1934              | 1938               | tr                | tr   | tr   | tr   | tr   | tr   |      |      |       | tr             |      | 0.14 | tr   |      |                   |      | tr   |
| 266   | 1-Hexadecanol acetate                      | 2003              | 2009               | tr                | tr   | tr   | tr   | tr   |      |      |      | 0.08  |                |      |      |      | tr   |                   |      |      |
| 267   | Octadecyl acetate                          | 2205              | 2212               | tr                | tr   | tr   |      | tr   |      | tr   |      |       |                |      |      |      |      |                   | 0.07 |      |
| 268   | <i>n</i> -Heptacosane                      | 2699              | 2700               |                   |      |      |      | tr   |      |      |      |       |                |      |      |      |      | 0.05              |      | 268  |
| 269   | <i>n</i> -Octacosane                       | 2798              | 2800               |                   |      |      |      | tr   |      |      |      | 0.27  |                |      |      |      | tr   | tr                |      | 269  |
| Total |                                            |                   |                    | 6.63              | 6.44 | 6.58 | 7.19 | 5.16 | 3.81 | 3.22 | 2.88 | 14.00 | 2.18           | 3.30 | 12.3 | 5.42 | 5.13 | 3.43              | 5.21 | 6.91 |

The compounds number is reported in order of elution, considering the total number of compounds eluted. For the identification of the compounds not reported in this table, see Table 1. tr = trace compound.

**Table S2.** Volatile compounds contained in the chili-pepper-flavored olive oil samples analyzed, expressed in area% as GC-FID measurement results.

|     | Compound                       | LRI <sub>exp</sub> | LRI <sub>lib</sub> | EVO1  | EVO2  | EVO3  |
|-----|--------------------------------|--------------------|--------------------|-------|-------|-------|
| 1   | (E)-2-Butenal                  | 619                | 629                | 0.08  | 0.09  | 0.03  |
| 4   | Acetic acid                    | 659                | 661                | 1.84  | 1.59  | 1.39  |
| 9   | 3-Penten-2-one                 | 690                | 691                |       | 1.53  |       |
| 11  | Acetoin                        | 726                | 716                | 0.04  |       | 0.04  |
| 13  | Isopentyl alcohol              | 733                | 729                | 0.03  | 0.04  | 0.05  |
| 14  | sec-Butylcarbinol              | 738                | 733                |       |       | 0.04  |
| 19  | Toluene                        | 764                | 763                | 0.12  |       |       |
| 24  | 3-Methylcrotonaldehyde         | 787                | 780                | 0.01  |       | 0.03  |
| 28  | n-Hexanal                      | 801                | 801                | 5.07  | 5.39  | 1.70  |
| 33  | 4-Methyl-1-pentanol            | 838                | 832                |       | 0.03  | 0.60  |
| 34  | (Z)-2-Hexenal                  | 842                | 842                | 0.27  | 37.41 | 0.21  |
| 37  | (E)-2-Hexenal                  | 850                | 850                | 30.38 | 2.01  | 19.21 |
| 41  | (E)-2-Hexenol                  | 864                | 864                | 6.33  | 2.39  | 12.64 |
| 42  | n-Hexanol                      | 868                | 867                | 4.30  | 2.95  | 3.34  |
| 44  | n-Pentanoic acid               | 889                | 918                | 0.04  |       | 0.08  |
| 46  | n-Heptanal                     | 902                | 906                | 0.65  | 0.29  | 0.11  |
| 48  | Sorbaldehyde                   | 914                | 923                | 0.12  | 0.38  | 0.04  |
| 49  | Sorbic aldehyde                | 916                | 914                | 0.20  | 0.20  | 0.03  |
| 53  | $\alpha$ -Thujene              | 925                | 927                |       |       | 0.02  |
| 54  | $\alpha$ -Pinene               | 931                | 933                | 0.05  | 0.01  | 0.02  |
| 58  | (E)-2-Heptenal                 | 959                | 956                | 1.34  | 0.78  | 0.51  |
| 62  | Benzaldehyde                   | 966                | 960                | 0.18  | 0.20  | 0.18  |
| 64  | n-Heptanol                     | 970                | 970                | 0.09  |       | 0.06  |
| 65  | Sabinene                       | 972                | 972                | 0.06  | 0.04  | 0.08  |
| 66  | $\beta$ -Pinene                | 975                | 978                | 0.13  |       | 0.14  |
| 69  | 6-Methyl-hept-5-en-2-one       | 984                | 986                | 1.12  | 0.30  | 0.18  |
| 80  | p-Cymene                       | 1025               | 1024               | 0.29  | 0.10  | 0.04  |
| 81  | Limonene                       | 1028               | 1030               | 1.82  | 0.46  | 0.22  |
| 84  | (Z)- $\beta$ -Ocimene          | 1035               | 1035               |       |       | 0.13  |
| 85  | Benzyl alcohol                 | 1036               | 1040               |       | 0.22  | 0.26  |
| 90  | (E)- $\beta$ -Ocimene          | 1046               | 1046               | 1.23  | 0.49  | 1.16  |
| 94  | (E)-2-Octenal                  | 1067               | 1058               | 0.13  | 0.11  | 0.05  |
| 95  | n-Octanol                      | 1071               | 1076               | 0.09  | 0.08  | 0.02  |
| 98  | Guaiacol                       | 1086               | 1094               | 0.03  | 0.16  |       |
| 100 | 3-Methylbutyl 2-methylbutyrate | 1098               | 1104               |       |       | 0.18  |

|     |                                           |      |      |      |      |       |
|-----|-------------------------------------------|------|------|------|------|-------|
| 103 | n-Nonanal                                 | 1103 | 1107 | 5.30 | 2.11 | 1.46  |
| 105 | 2-Methylbutyl isovalerate                 | 1106 | 1109 |      |      | 0.07  |
| 111 | (4E,6Z)-Alloocimene                       | 1128 | 1128 | 0.07 | 0.05 | 0.05  |
| 113 | Pentyl 2-methylbutyrate                   | 1136 | 1142 |      |      | 0.2   |
| 114 | (E,E)-Allocimene                          | 1140 | 1145 | 0.08 |      |       |
| 115 | (Z)-3-Hexenyl isobutyrate                 | 1141 | 1146 |      |      | 0.32  |
| 116 | Pentyl isovalerate                        | 1142 | 1143 |      |      | 0.63  |
| 117 | Hexyl isobutyrate                         | 1146 | 1150 |      | 0.02 | 0.27  |
| 123 | Ethyl benzoate                            | 1170 | 1170 |      |      | 0.06  |
| 127 | Terpinen-4-ol                             | 1183 | 1184 | 0.03 |      |       |
| 132 | Methyl salicylate                         | 1193 | 1192 | 0.24 | 0.10 | 0.16  |
| 133 | n-Dodecane                                | 1196 | 1200 | 0.03 |      | 0.04  |
| 134 | 4-Methylpentyl 2-methylbutanoate          | 1198 | 1202 |      | 0.42 | 3.85  |
| 135 | 4-Methylpentyl 3-methylbutanoate          | 1209 | 1206 |      |      | 11.12 |
| 136 | Pelargol                                  | 1208 | 1200 | 1.46 | 1.66 |       |
| 137 | 4-Methylhexyl isobutyrate                 | 1215 | 1220 |      |      | 0.02  |
| 141 | (Z)-3-Hexenyl 2-methylbutyrate            | 1233 | 1231 |      | 0.11 |       |
| 143 | Hexyl 3-methylbutyrate                    | 1246 | 1243 |      | 0.05 | 1.97  |
| 144 | (E)-Hex-2-enyl 3-methylbutanoate          | 1248 | 1243 | 0.03 |      | 0.29  |
| 151 | 6-Methylhept-4-en-1-yl isobutyrate        | 1289 | 1293 |      |      | 0.11  |
| 152 | 3-Methylpentyl (2E)-2-methyl-2-butenolate | 1291 | 1300 |      |      | 0.06  |
| 153 | 5-Methylhexyl 2-methylbutanoate           | 1294 | 1299 |      |      | 0.03  |
| 155 | 5-Methylhexyl 3-methylbutanoate           | 1300 | 1303 |      |      | 0.14  |
| 159 | 4-Methylhexyl 2-methylbutanoate           | 1308 | 1307 |      |      | 0.03  |
| 160 | 4-Methylpentyl 4-methylpentanoate         | 1313 | 1315 |      |      | 0.28  |
| 163 | (Z)-3-Hexenyl tiglate                     | 1321 | 1325 |      |      | 0.03  |
| 165 | Heptyl 2-methylbutyrate                   | 1332 | 1333 |      |      | 0.04  |
| 167 | Heptyl isovalerate                        | 1338 | 1338 |      |      | 0.17  |
| 168 | Octyl isobutyrate                         | 1342 | 1346 |      |      | 0.03  |
| 170 | $\alpha$ -Cubebene                        | 1347 | 1347 |      | 0.03 | 0.11  |
| 177 | Cyclosativene                             | 1370 | 1367 | 0.23 | 0.09 | 0.61  |
| 178 | $\alpha$ -Copaene                         | 1376 | 1375 | 1.28 | 0.44 | 3.00  |
| 180 | 6-Methylhept-4-en-1-yl 3-methylbutanoate  | 1385 | 1388 | 0.01 |      | 0.48  |
| 181 | $\beta$ -Elemene                          | 1389 | 1390 | 0.02 |      | 0.02  |
| 183 | 6-Methylheptyl 2-methylbutanoate          | 1394 | 1398 |      |      | 0.06  |
| 184 | Benzyl isovalerate                        | 1395 | 1399 |      |      | 0.06  |
| 185 | n-Tetradecane                             | 1397 | 1400 | 0.02 | 0.04 | 0.07  |
| 188 | (Z)- $\alpha$ -Bergamotene                | 1411 | 1412 | 0.01 |      |       |
| 191 | (E)-Caryophyllene                         | 1420 | 1424 | 0.05 | 0.02 |       |
| 194 | $\beta$ -Copaene                          | 1431 | 1433 |      |      | 0.06  |
| 196 | (E)- $\alpha$ -Bergamotene                | 1435 | 1432 |      | 0.08 |       |
| 203 | (E)- $\beta$ -Farnesene                   | 1453 | 1452 |      | 0.01 | 0.01  |



|              |                       |      |      |              |              |              |
|--------------|-----------------------|------|------|--------------|--------------|--------------|
| 204          | $\alpha$ -Humulene    | 1456 | 1454 |              |              | 0.01         |
| 208          | Cadina-1(6),4-diene   | 1474 | 1474 |              |              | 0.01         |
| 211          | $\gamma$ -Himachalene | 1483 | 1481 |              | 0.12         | 0.37         |
| 223          | $\delta$ -Cadinene    | 1519 | 1512 | 0.03         | 0.02         | 0.05         |
| 224          | (E)-Calamenene        | 1522 | 1527 |              |              | 0.03         |
| <b>Total</b> |                       |      |      | <b>64.93</b> | <b>62.62</b> | <b>69.17</b> |

The compound's number is reported in order of elution, considering the total number of compounds identified in chili peppers.

**Table S3.** Standard key compounds used for the training of panelists for sensorial analysis.

|    | Compound                         |             |
|----|----------------------------------|-------------|
| 1  | Isovaleric aldehyde              | 590-86-3    |
| 2  | 2-Methylbutyraldehyde            | 96-17-3     |
| 3  | 3-Methyl-2-butanol               | 598-75-4    |
| 4  | Acetoin                          | 513-86-0    |
| 5  | Isopentyl alcohol                | 123-51-3    |
| 6  | Isobutyric acid                  | 79-31-2     |
| 7  | 2,3-Butadienol                   | 19132-06-0  |
| 8  | Isopentyl formate                | 110-45-2    |
| 9  | Butanoic acid                    | 107-92-6    |
| 10 | (Z)-3-Hexenal                    | 6789-80-6   |
| 11 | <i>n</i> -Hexanal                | 66-25-1     |
| 12 | Ethyl 2-methylbutyrate           | 53956-13-1  |
| 13 | (E)-2-Hexenal                    | 505-57-7    |
| 14 | Isovaleric acid                  | 503-74-2    |
| 15 | <i>n</i> -Hexanol                | 111-27-3    |
| 16 | 2-Methylbutyric acid             | 116-53-0    |
| 17 | <i>n</i> -Pentanoic acid         | 109-52-4    |
| 18 | 3-(Methylthio)propionaldehyde    | 3268-49-3   |
| 19 | 4-methylpentanoic acid           | 646-07-1    |
| 20 | 3-Methylmercapto-1-propanol      | 505-10-2    |
| 21 | <i>n</i> -Hexanoic acid          | 142-62-1    |
| 22 | Ethyl hexanoate                  | 123-66-0    |
| 23 | Isobutyl 2-methylbutyrate        | 2445-67-2   |
| 24 | Phenylacetaldehyde               | 122-78-1    |
| 25 | Guaiacol                         | 90-05-1     |
| 26 | 2-Methylbutyl 2-methylbutyrate   | 2445-78-5   |
| 27 | 3-methylbutyl 3-isovalerate      | 659-70-1    |
| 28 | 2-Methylbutyl isovalerate        | 2445-77-4   |
| 29 | 3-Methylpentyl isobutyrate       | 84254-84-2  |
| 30 | Phenethyl alcohol                | 60-12-8     |
| 31 | (Z)-3-Hexenyl isobutyrate        | 41519-23-7  |
| 32 | Pentyl isovalerate               | 25415-62-7  |
| 33 | 3-Methoxy-2-isobutylpyrazine     | 24683-00-9  |
| 34 | Methyl salicylate                | 119-36-8    |
| 35 | 4-Methylpentyl 2-methylbutanoate | 35852-40-5  |
| 36 | 4-Methylpentyl 3-methylbutanoate | 850309-45-4 |
| 37 | (Z)-3-Hexenyl 2-methylbutyrate   | 53398-85-9  |
| 38 | (Z)-3-Hexenyl 3-methylbutyrate   | 35154-45-1  |
| 39 | Hexyl 3-methylbutyrate           | 10032-13-0  |
| 40 | (E)-Hex-2-enyl 3-methylbutanoate | 68698-59-9  |

|    |                                   |             |
|----|-----------------------------------|-------------|
| 41 | Heptyl isobutyrate                | 2349-13-5   |
| 42 | Ethyl salicylate                  | 118-61-6    |
| 43 | <i>n</i> -Nonanoic acid           | 112-05-0    |
| 44 | 4-Methylhexyl 2-methylbutanoate   | 850309-46-5 |
| 45 | 4-Methylpentyl 4-methylpentanoate | 35852-42-7  |
| 46 | <i>n</i> -Decanoic acid           | 334-48-5    |
| 47 | (E)-Caryophyllene                 | 87-44-5     |

Table S4. Contribution of the variables on PC1 and PC2.

|    | Compound               | Without EVOOs | Without EVOOs | With EVOOs | With EVOOs |
|----|------------------------|---------------|---------------|------------|------------|
|    |                        | PC1           | PC2           | PC1        | PC2        |
| 1  | (E)-2-Butenal          | 0.000         | 0.034         | 0.000      | 0.045      |
| 2  | 3-methyl-2-Butanone    | 0.001         | 0.110         | 0.000      | 0.144      |
| 3  | Isovaleric aldehyde    | 0.001         | 0.128         | 0.000      | 0.145      |
| 4  | Ethanoic acid          | 0.024         | 73.790        | 0.121      | 69.630     |
| 6  | 2-Methylbutyraldehyde  | 0.007         | 0.288         | 0.003      | 0.296      |
| 7  | 3-Methyl-2-butanol     | 0.005         | 0.039         | 0.003      | 0.043      |
| 8  | (Z)-2-Buten-1-ol       | 0.039         | 0.000         | 0.026      | 0.002      |
| 9  | 3-Pentenone            | 0.013         | 0.062         | 0.002      | 0.031      |
| 10 | Propionic acid         | 0.008         | 0.027         | 0.005      | 0.034      |
| 11 | Acetoin                | 0.174         | 23.219        | 0.269      | 22.832     |
| 12 | Isoprenol              | 0.017         | 0.097         | 0.011      | 0.104      |
| 13 | Isopentyl alcohol      | 0.005         | 0.067         | 0.002      | 0.086      |
| 14 | sec-Butylcarbinol      | 0.001         | 0.158         | 0.002      | 0.163      |
| 16 | Isopropyl ethyl ketone | 0.003         | 0.002         | 0.002      | 0.003      |
| 17 | Ethyl iso-butyrate     | 0.007         | 0.030         | 0.004      | 0.038      |
| 18 | Isobutyric acid        | 0.001         | 0.038         | 0.001      | 0.039      |
| 19 | Pentyl alcohol         | 0.000         | 0.001         | 0.000      | 0.000      |
| 20 | Toluene                | 0.027         | 0.000         | 0.021      | 0.001      |
| 21 | (E)-2-Penten-1-ol      | 0.001         | 0.006         | 0.001      | 0.009      |
| 25 | 2,3-Butadienol         | 0.024         | 0.000         | 0.017      | 0.002      |
| 27 | (Z)-3-Hexenal          | 0.002         | 0.004         | 0.002      | 0.006      |
| 28 | n-Hexanal              | 13.869        | 0.129         | 10.528     | 0.180      |
| 29 | Ethyl lactate          | 0.029         | 0.001         | 0.020      | 0.003      |
| 30 | 2-Hexanol              | 0.127         | 0.001         | 0.089      | 0.009      |
| 31 | 4-Methyl-2-pentenal    | 0.199         | 0.000         | 0.142      | 0.001      |
| 34 | Isovaleric acid        | 0.000         | 0.030         | 0.000      | 0.038      |
| 35 | 4-Methyl-1-pentanol    | 0.472         | 1.281         | 0.460      | 0.358      |
| 36 | (Z)-2-Hexenal          | 0.007         | 0.000         | 0.782      | 5.406      |
| 37 | Ethyl 2-methylbutyrate | 0.007         | 0.006         | 0.007      | 0.001      |
| 38 | (E)-2-Hexenal          | 83.586        | 0.162         | 85.784     | 0.226      |
| 40 | (E)-3-Hexenol          | 0.080         | 0.027         | 0.045      | 0.000      |
| 41 | (Z)-3-Hexenol          | 0.008         | 0.010         | 0.008      | 0.003      |
| 42 | (E)-2-Hexenol          | 0.213         | 0.170         | 0.596      | 0.000      |

---

|     |                            |       |       |       |       |
|-----|----------------------------|-------|-------|-------|-------|
| 43  | n-Hexanol                  | 0.734 | 0.009 | 0.743 | 0.058 |
| 58  | (E)-2-Heptenal             | 0.000 | 0.000 | 0.003 | 0.007 |
| 68  | 6-Methyl-hept-5-en-2-one   | 0.000 | 0.015 | 0.002 | 0.008 |
| 81  | Limonene                   | 0.000 | 0.002 | 0.003 | 0.000 |
| 90  | (E)- $\beta$ -Ocimene      | 0.288 | 0.013 | 0.247 | 0.010 |
| 91  | Isopentyl butyrate         | 0.000 | 0.009 | 0.000 | 0.010 |
| 99  | Isobutyl tiglate           | 0.001 | 0.008 | 0.000 | 0.009 |
| 103 | n-Nonanal                  | 0.000 | 0.014 | 0.033 | 0.014 |
| 106 | 3-Methylpentyl isobutyrate | 0.007 | 0.001 | 0.007 | 0.000 |
| 114 | (E,E)-Allocimene           | 0.005 | 0.001 | 0.004 | 0.000 |
| 116 | Pentyl isovalerate         | 0.007 | 0.009 | 0.005 | 0.007 |

---

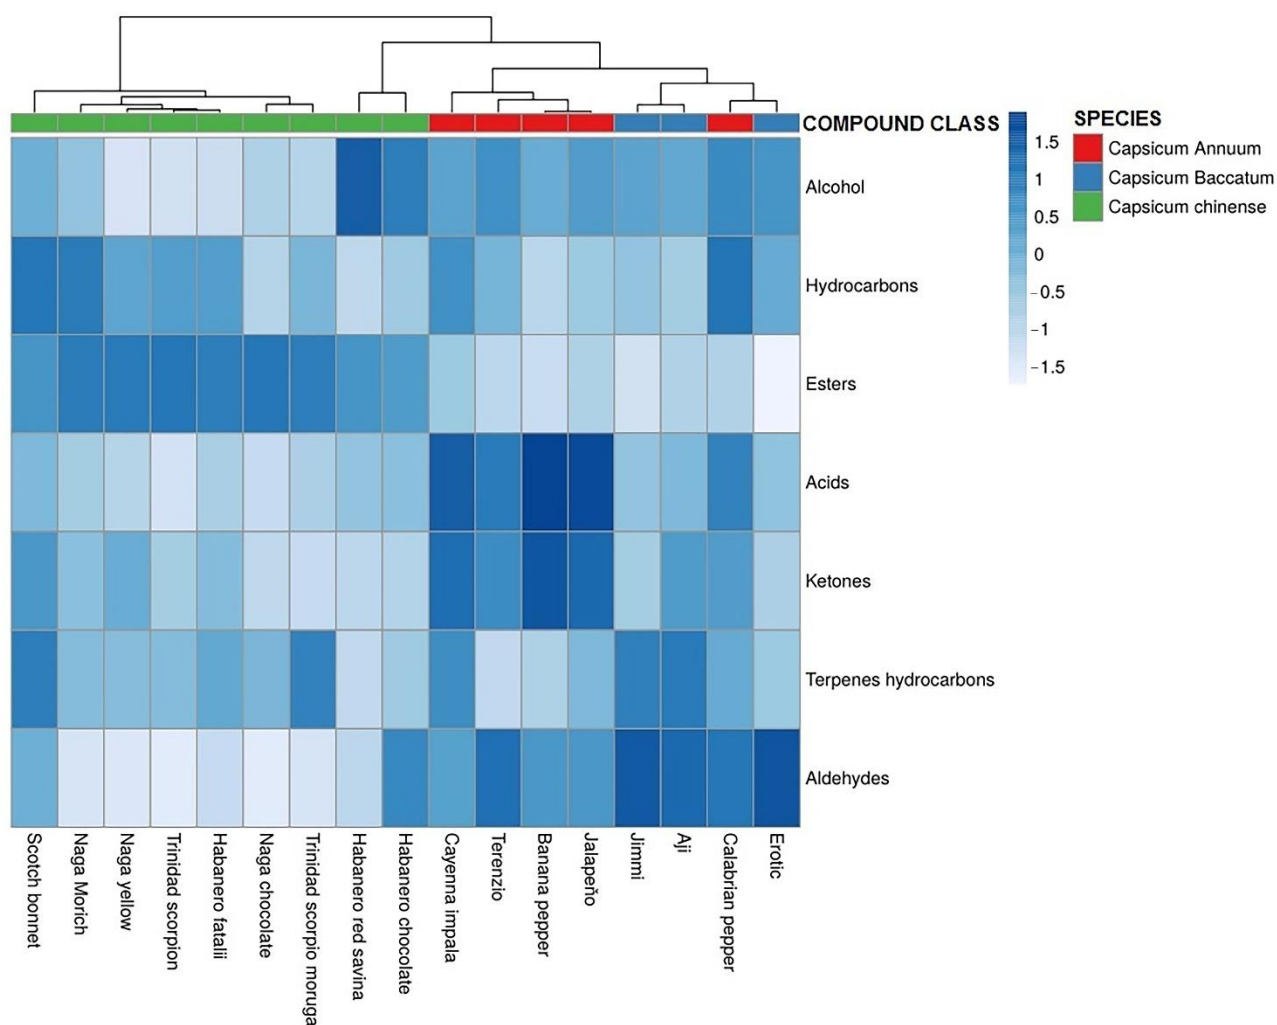

**Figure S1.** Hierarchical cluster analysis based on relative percentage areas of identified compounds classes. Original values are  $\ln(x + 1)$ -transformed. Rows are centered; Pareto scaling is applied to rows. Imputation is used for missing value estimation. Columns are clustered using correlation distance and average linkage. There is a total of 7 rows and 17 columns.

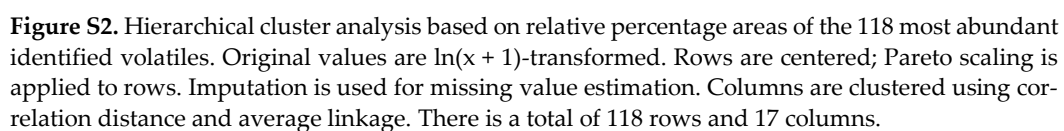

*Capsicum chinense*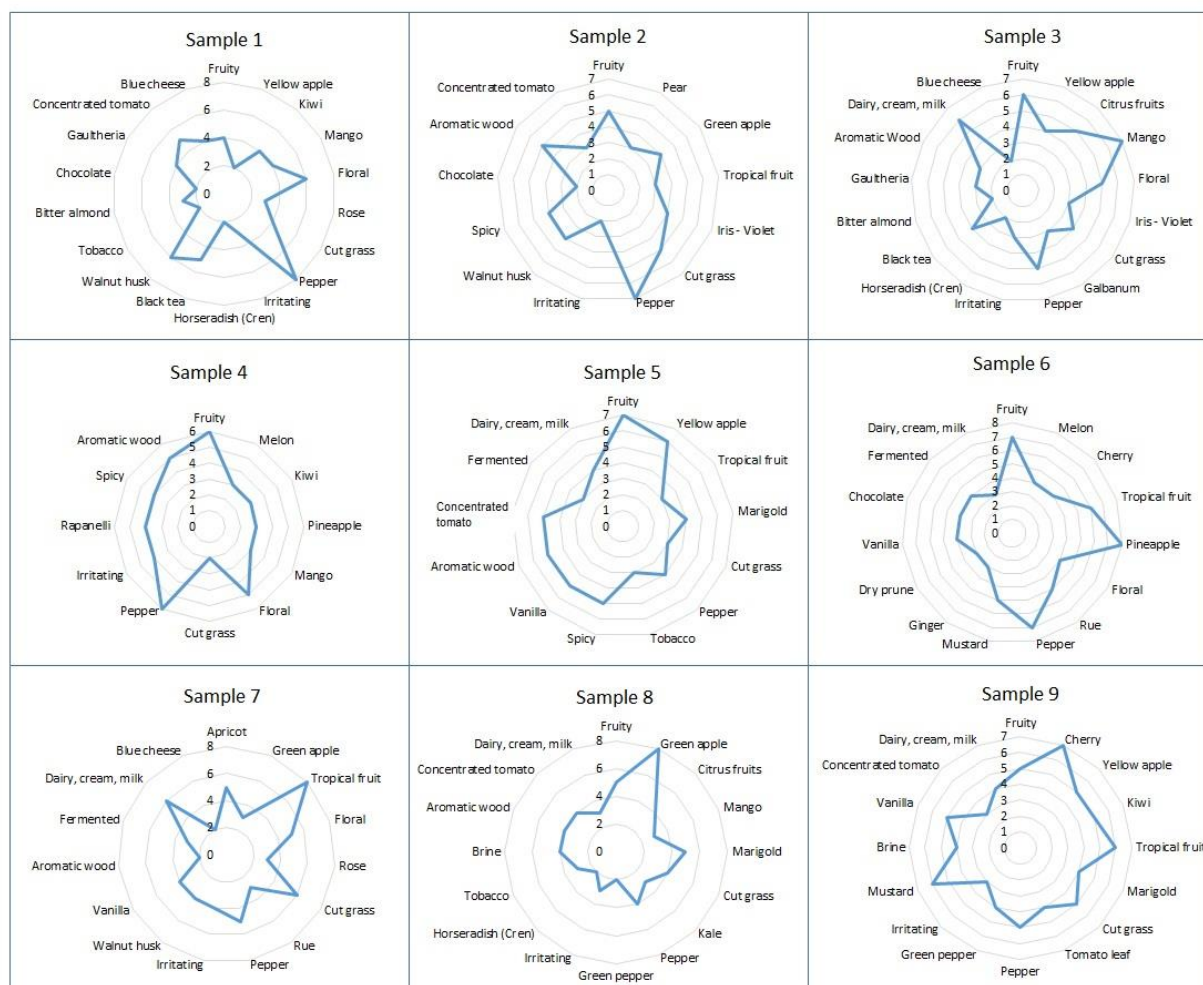

**Figure S3.** Aroma profile of the *Capsicum chinense* pepper from descriptive sensory analysis on line scale (n = 10). Sample 1 (Naga Morich), sample 2 (Trinidad Scorpion), sample 3 (Habanero Fatalii), sample 4 (Naga Yellow), sample 5 (Naga Chocolate), sample 6 (Trinidad Scorpio Moruga), sample 7 (Habanero Red Savina), sample 8 (Habanero Chocolate), and sample 9 (Scotch Bonnet).

*Capsicum annuum*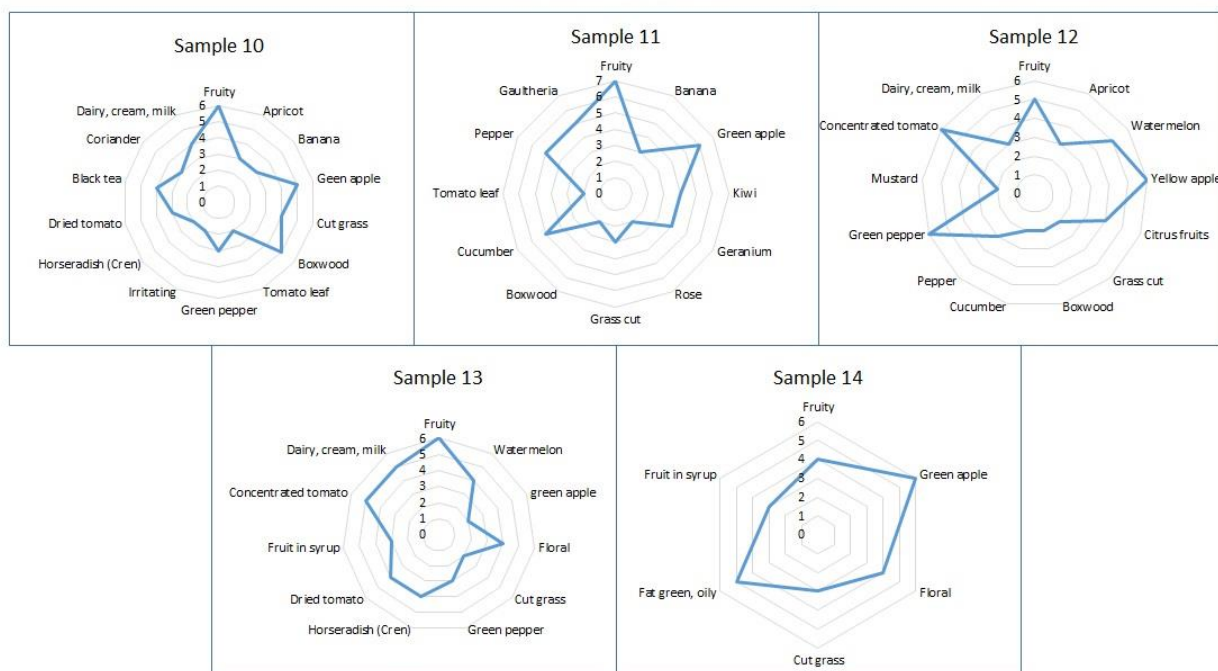

**Figure S4.** Aroma profile of the *Capsicum annuum* pepper from descriptive sensory analysis on line scale (n = 10). Sample 10 (Banana Pepper), sample 11 (Terenzio), sample 12 (Cayenna Impala), sample 13 (Jalapeño), and sample 14 (Calabrian pepper).

*Capsicum baccatum*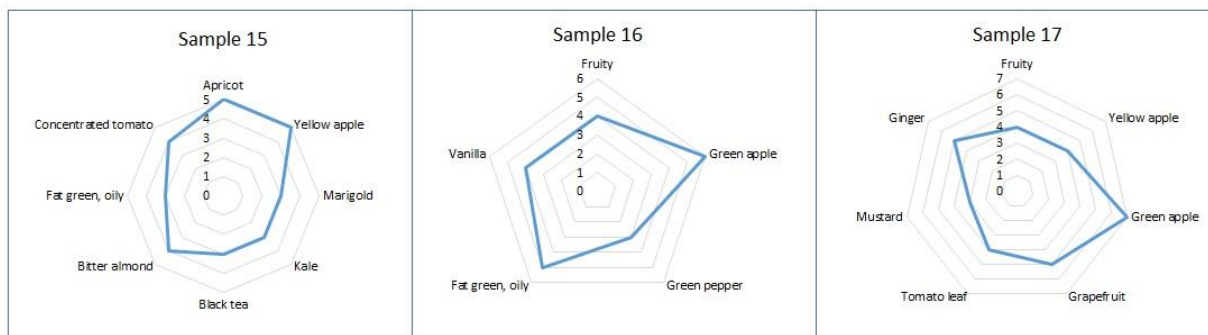

**Figure S5.** Aroma profile of the *Capsicum baccatum* pepper from descriptive sensory analysis on line scale (n = 10). Sample 15 (Erotic), sample 16 (Jimmi), and sample 17 (Aji limón).



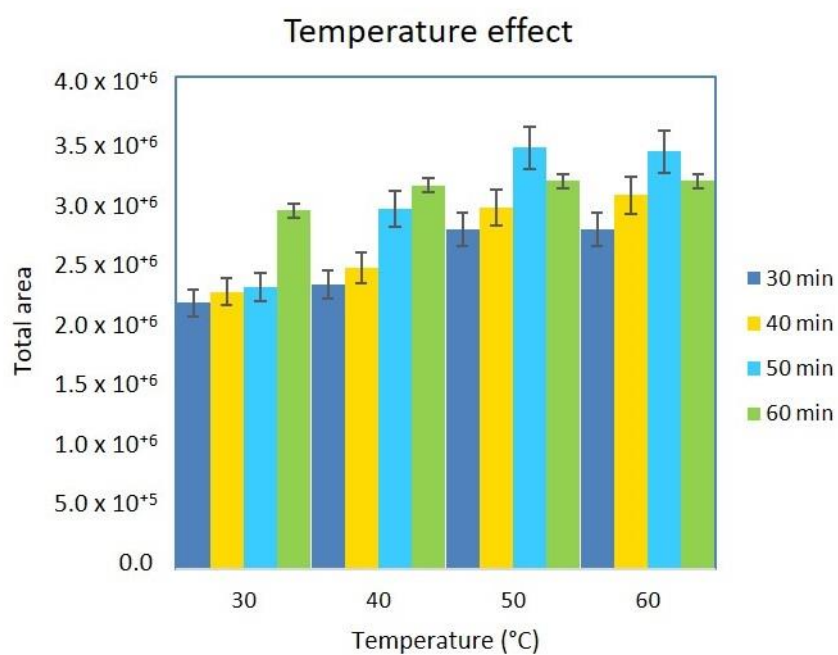

Figure S6.

Influence of temperature on SPME method extraction optimization.

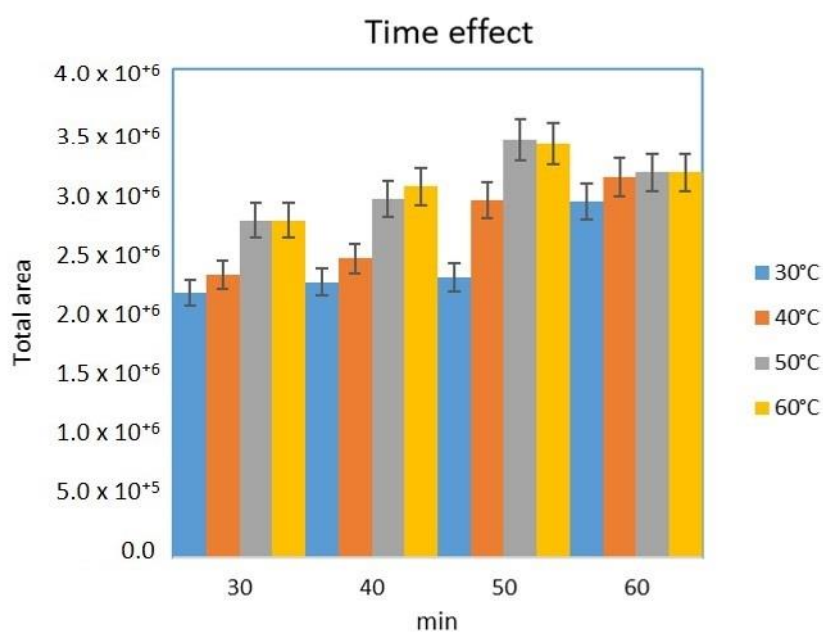

Figure S7. Influence of time on SPME method extraction optimization.

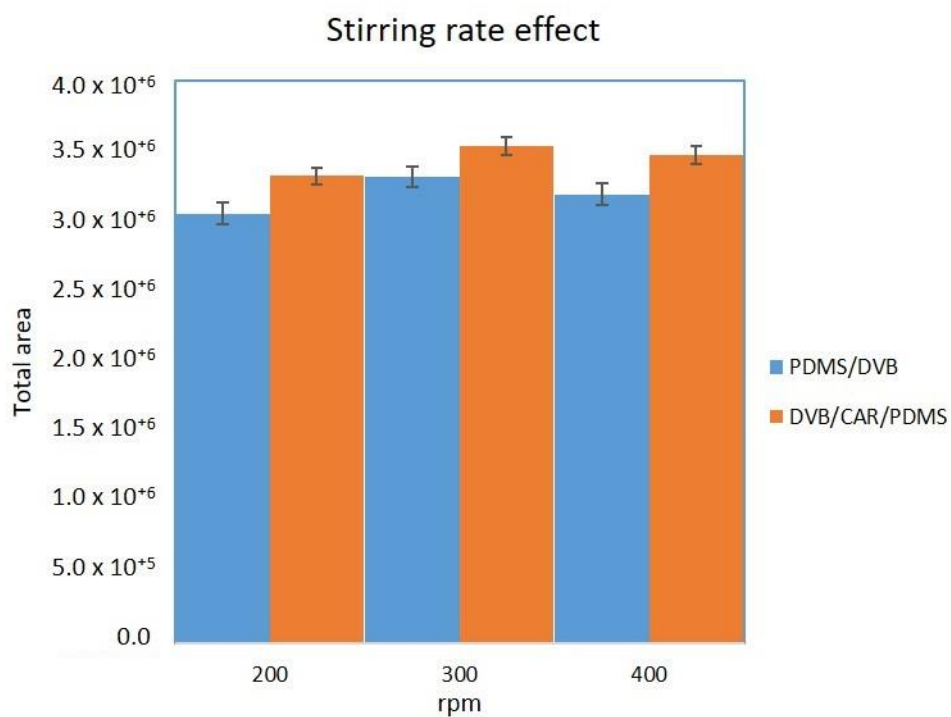

**Figure S8.** Influence of stirring rate on SPME method extraction optimization.

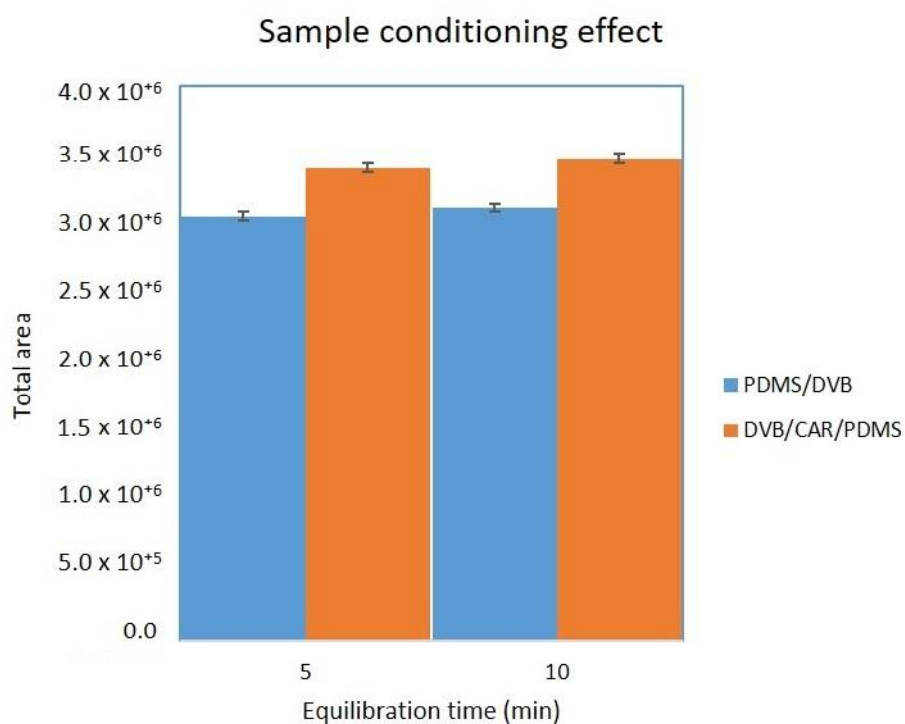

**Figure S9.** Influence of sample time conditioning on SPME method extraction optimization.

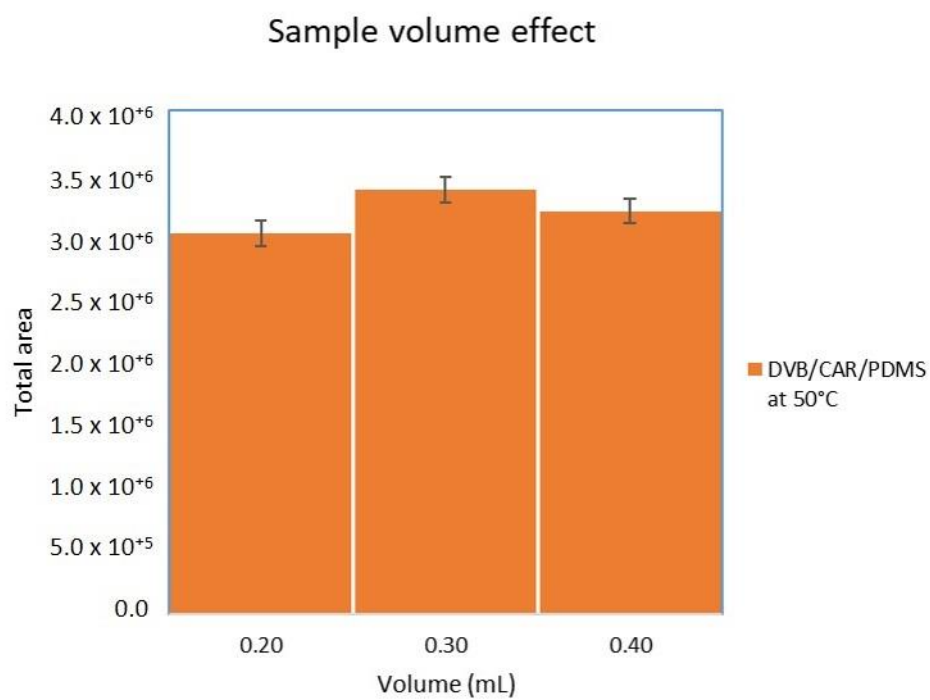

**Figure S10.** Influence of sample volume on SPME method extraction optimization.

| Chili pepper sensorial analysis |                     |
|---------------------------------|---------------------|
| Fresh Fruity and Floral Notes   | Fruity              |
|                                 | Apricot             |
|                                 | Watermelon          |
|                                 | Melon               |
|                                 | Banana              |
|                                 | Cherry              |
|                                 | Yellow apple        |
|                                 | green apple         |
|                                 | Pear                |
|                                 | Kiwi                |
|                                 | Citrus fruits       |
|                                 | Grapefruit          |
|                                 | Tropical fruit      |
|                                 | Pineapple           |
|                                 | Mango               |
|                                 | Litchi              |
|                                 | Floral              |
|                                 | Geranium            |
|                                 | Marigold            |
|                                 | Pink                |
|                                 | Iris - Violet       |
| Fresh Vegetable Notes           | Grass cut           |
|                                 | Galbanum            |
|                                 | Boxwood             |
|                                 | Artichoke           |
|                                 | Kale                |
|                                 | Thistle             |
|                                 | Cucumber            |
|                                 | Rue                 |
|                                 | Tomato leaf         |
|                                 | Ripe pepper         |
|                                 | Green pepper        |
|                                 | Irritating          |
|                                 | Mustard, pungent    |
|                                 | Horseradish (Cren)  |
|                                 | Ginger              |
|                                 | Rapanelli           |
| Dry Vegetable Notes             | Paprika             |
|                                 | Dried tomato        |
|                                 | Hay, dry grass      |
|                                 | Black tea           |
|                                 | Walnut husk         |
|                                 | Dry leaves          |
|                                 | Tobacco             |
| Other notes                     | Brine               |
|                                 | Smoked              |
|                                 | Fat green, oily     |
|                                 | Spicy               |
|                                 | Cinnamon            |
|                                 | Coriander           |
|                                 | Bitter almond       |
|                                 | Vanilla             |
|                                 | Chocolate           |
|                                 | Gaultheria          |
|                                 | Aromatic wood       |
|                                 | Caramel             |
|                                 | Fruit in syrup      |
|                                 | Concentrated tomato |
|                                 | Fermented           |
|                                 | Dairy, cream, milk  |
|                                 | Blue cheese         |

**Figure S11.** List of descriptors used in the sensory analysis of chili peppers
